# Supplementary material for: Association of brain amyloidosis with the incidence and frequency of neuropsychiatric symptoms in ADNI: a multisite observational cohort study
Source: PubMed Central journal article supplement — BMJ Open. 2019 Dec 18;9(12):e031947. doi: 10.1136/bmjopen-2019-031947 (PMC6937083; doi:10.1136/bmjopen-2019-031947), 2019-12-18
Supplement: bmjopen-2019-031947supp001.pdf [file bmjopen-2019-031947supp001.pdf]

| Supplemental Table 1           |            |                     |                    |                         |         |                    |                    |                          |         |                     |                     |                         |         |                    |                     |                          |         |
|--------------------------------|------------|---------------------|--------------------|-------------------------|---------|--------------------|--------------------|--------------------------|---------|---------------------|---------------------|-------------------------|---------|--------------------|---------------------|--------------------------|---------|
| Variables                      |            | NC (N=275)          |                    |                         |         | SMC (N=100)        |                    |                          |         | MCI (N=559)         |                     |                         |         | DEMENTIA (N=143)   |                     |                          |         |
|                                |            | Amyloid-<br>(N=202) | Amyloid+<br>(N=73) | OR                      | q-value | Amyloid-<br>(N=72) | Amyloid+<br>(N=28) | OR                       | q-value | Amyloid-<br>(N=269) | Amyloid+<br>(N=290) | OR                      | q-value | Amyloid-<br>(N=25) | Amyloid+<br>(N=118) | OR                       | q-value |
| <b>Anxiety</b>                 | <b>Yes</b> | 10 (5)              | 2 (2.7)            | 0.54<br>(0.12,<br>2.52) | NS      | 6 (8.3)            | 2 (7.1)            | 0.85<br>(0.16,<br>4.49)  | NS      | 31 (11.5)           | 55 (19)             | 1.8<br>(1.12,<br>2.9)   | NS      | 3 (12)             | 33 (28)             | 2.85<br>(0.8,<br>10.16)  | NS      |
| <b>Elation</b>                 | <b>Yes</b> | 0 (0)               | 0 (0)              | ∞                       | NS      | 0 (0)              | 0 (0)              | ∞                        | NS      | 9 (3.3)             | 7 (2.4)             | 0.71<br>(0.26,<br>1.93) | NS      | 0 (0)              | 2 (1.7)             | ∞                        | NS      |
| <b>Hallucinations</b>          | <b>Yes</b> | 1 (0.5)             | 0 (0)              | ∞                       | NS      | 0 (0)              | 0 (0)              | ∞                        | NS      | 1 (0.4)             | 3 (1)               | 2.8<br>(0.29,<br>27.08) | NS      | 0 (0)              | 6 (5.1)             | ∞                        | NS      |
| <b>Delusions</b>               | <b>Yes</b> | 0 (0)               | 0 (0)              | ∞                       | NS      | 0 (0)              | 0 (0)              | ∞                        | NS      | 0 (0)               | 7 (2.4)             | ∞                       | NS      | 1 (4)              | 9 (7.6)             | 1.98<br>(0.24,<br>16.38) | NS      |
| <b>Apathy</b>                  | <b>Yes</b> | 6 (3)               | 0 (0)              | ∞                       | NS      | 4 (5.6)            | 1 (3.6)            | 0.63<br>(0.07,<br>5.9)   | NS      | 40 (14.9)           | 45 (15.5)           | 1.05<br>(0.66,<br>1.67) | NS      | 16 (64)            | 44 (37.3)           | 0.33<br>(0.13,<br>0.81)  | NS      |
| <b>Agitation</b>               | <b>Yes</b> | 9 (4.5)             | 1 (1.4)            | 0.3<br>(0.04,<br>2.41)  | NS      | 3 (4.2)            | 3 (10.7)           | 2.76<br>(0.52,<br>14.58) | NS      | 38 (14.1)           | 55 (19)             | 1.42<br>(0.9,<br>2.23)  | NS      | 9 (36)             | 34 (28.8)           | 0.72<br>(0.29,<br>1.79)  | NS      |
| <b>Depression</b>              | <b>Yes</b> | 17 (8.4)            | 1 (1.4)            | 0.15<br>(0.02,<br>1.15) | NS      | 9 (12.5)           | 3 (10.7)           | 0.84<br>(0.21,<br>3.36)  | NS      | 65 (24.2)           | 78 (26.9)           | 1.15<br>(0.79,<br>1.68) | NS      | 7 (28)             | 45 (38.1)           | 1.59<br>(0.62,<br>4.11)  | NS      |
| <b>Disinhibition</b>           | <b>Yes</b> | 5 (2.5)             | 0 (0)              | ∞                       | NS      | 1 (1.4)            | 0 (0)              | ∞                        | NS      | 24 (8.9)            | 30 (10.3)           | 1.18<br>(0.67,<br>2.07) | NS      | 6 (24)             | 20 (16.9)           | 0.65<br>(0.23,<br>1.83)  | NS      |
| <b>Irritability</b>            | <b>Yes</b> | 20 (9.9)            | 4 (5.5)            | 0.53<br>(0.17,<br>1.61) | NS      | 9 (12.5)           | 4 (14.3)           | 1.17<br>(0.33,<br>4.16)  | NS      | 70 (26)             | 76 (26.2)           | 1.01<br>(0.69,<br>1.47) | NS      | 4 (16)             | 39 (33.1)           | 2.59<br>(0.83,<br>8.07)  | NS      |
| <b>Aberrant motor behavior</b> | <b>Yes</b> | 2 (1)               | 0 (0)              | ∞                       | NS      | 1 (1.4)            | 0 (0)              | ∞                        | NS      | 7 (2.6)             | 13 (4.5)            | 1.76<br>(0.69,<br>4.48) | NS      | 2 (8)              | 19 (16.1)           | 2.21<br>(0.48,<br>10.17) | NS      |
| <b>Sleep disturbance</b>       | <b>Yes</b> | 22 (10.9)           | 7 (9.6)            | 0.87<br>(0.36,<br>2.13) | NS      | 17 (23.6)          | 2 (7.1)            | 0.25<br>(0.05,<br>1.16)  | NS      | 55 (20.4)           | 59 (20.3)           | 0.99<br>(0.66,<br>1.49) | NS      | 4 (16)             | 19 (16.1)           | 1.01<br>(0.31,<br>3.28)  | NS      |
| <b>Appetite changes</b>        | <b>Yes</b> | 3 (1.5)             | 0 (0)              | ∞                       | NS      | 3 (4.2)            | 1 (3.6)            | 0.85<br>(0.08,<br>8.53)  | NS      | 25 (9.3)            | 21 (7.2)            | 0.76<br>(0.41,<br>1.39) | NS      | 9 (36)             | 25 (21.2)           | 0.48<br>(0.19,<br>1.21)  | NS      |
