# Supplementary material for: Association of brain amyloidosis with the incidence and frequency of neuropsychiatric symptoms in ADNI: a multisite observational cohort study
Source: PubMed Central journal article supplement — BMJ Open. 2019 Dec 18;9(12):e031947. doi: 10.1136/bmjopen-2019-031947 (PMC6937083; doi:10.1136/bmjopen-2019-031947), 2019-12-18
Supplement: bmjopen-2019-031947supp002.pdf [file bmjopen-2019-031947supp002.pdf]

| Supplemental Table 2           |                     |                    |         |                    |                    |         |                     |                     |              |                    |                     |              |
|--------------------------------|---------------------|--------------------|---------|--------------------|--------------------|---------|---------------------|---------------------|--------------|--------------------|---------------------|--------------|
| Variables                      | NC (N=275)          |                    |         | SMC (N=100)        |                    |         | MCI (N=559)         |                     |              | DEMENTIA (N=143)   |                     |              |
|                                | Amyloid-<br>(N=202) | Amyloid+<br>(N=73) | q-value | Amyloid-<br>(N=72) | Amyloid+<br>(N=28) | q-value | Amyloid-<br>(N=269) | Amyloid+<br>(N=290) | q-value      | Amyloid-<br>(N=25) | Amyloid+<br>(N=118) | q-value      |
| <b>Anxiety</b>                 | 0.11 (0.59)         | 0.10 (0.59)        | NS      | 0.21 (1.01)        | 0.18 (0.77)        | NS      | 0.31 (1.14)         | 0.57 (1.44)         | <b>0.023</b> | 0.38 (1.14)        | 0.70 (1.39)         | NS           |
| <b>Elation</b>                 | 0 (0)               | 0 (0)              | ∞       | 0 (0)              | 0 (0)              | ∞       | 0.08 (0.51)         | 0.09 (0.67)         | NS           | 0 (0)              | 0.08 (0.74)         | NS           |
| <b>Hallucinations</b>          | 0 (0)               | 0 (0)              | ∞       | 0 (0)              | 0 (0)              | ∞       | 0.02 (0.26)         | 0.07 (0.59)         | NS           | 0 (0)              | 0.07 (0.31)         | NS           |
| <b>Delusions</b>               | 0 (0)               | 0 (0)              | ∞       | 0 (0)              | 0 (0)              | ∞       | 0.004 (0.06)        | 0.14 (0.64)         | <b>0.001</b> | 0.13 (0.61)        | 0.36 (1.45)         | NS           |
| <b>Apathy</b>                  | 0.11 (0.89)         | 0.24 (1.19)        | NS      | 0.14 (0.59)        | 0.11 (0.57)        | NS      | 0.50 (1.61)         | 0.63 (1.73)         | NS           | 2.58 (2.87)        | 1.27 (2.14)         | <b>0.011</b> |
| <b>Agitation</b>               | 0.14 (0.95)         | 0.10 (0.42)        | NS      | 0.06 (0.29)        | 0.18 (0.61)        | NS      | 0.39 (1.11)         | 0.56 (1.35)         | NS           | 1.71 (2.85)        | 0.62 (1.27)         | <b>0.003</b> |
| <b>Depression</b>              | 0.23 (0.92)         | 0.18 (0.83)        | NS      | 0.24 (0.83)        | 0.11 (0.32)        | NS      | 0.64 (1.41)         | 0.72 (1.38)         | NS           | 0.67 (1.24)        | 0.80 (1.27)         | NS           |
| <b>Disinhibition</b>           | 0.04 (0.21)         | 0.13 (0.75)        | NS      | 0.03 (0.24)        | 0 (0)              | NS      | 0.25 (1.02)         | 0.31 (1.11)         | NS           | 0.71 (1.37)        | 0.32 (1.04)         | NS           |
| <b>Irritability</b>            | 0.21 (0.88)         | 0.29 (0.86)        | NS      | 0.26 (0.79)        | 0.25 (0.65)        | NS      | 0.78 (1.78)         | 0.75 (1.54)         | NS           | 0.63 (1.61)        | 1.02 (2.063)        | NS           |
| <b>Aberrant motor behavior</b> | 0.01 (0.07)         | 0.08 (0.52)        | NS      | 0.04 (0.35)        | 0 (0)              | NS      | 0.09 (0.64)         | 0.29 (1.28)         | <b>0.025</b> | 0.29 (1.0)         | 0.59 (1.62)         | NS           |
| <b>Sleep disturbance</b>       | 0.38 (1.29)         | 0.49 (1.28)        | NS      | 0.57 (1.23)        | 0.25 (0.93)        | NS      | 0.85 (1.94)         | 0.99 (2.26)         | NS           | 0.46 (1.14)        | 0.59 (1.58)         | NS           |
| <b>Appetite changes</b>        | 0.10 (0.71)         | 0.24 (1.22)        | NS      | 0.21 (1.17)        | 0.04 (0.19)        | NS      | 0.29 (1.22)         | 0.51 (1.70)         | 0.084        | 2.42 (3.86)        | 0.86 (2.1)          | <b>0.006</b> |
