# Supplementary material for: Association of brain amyloidosis with the incidence and frequency of neuropsychiatric symptoms in ADNI: a multisite observational cohort study
Source: PubMed Central journal article supplement — BMJ Open. 2019 Dec 18;9(12):e031947. doi: 10.1136/bmjopen-2019-031947 (PMC6937083; doi:10.1136/bmjopen-2019-031947), 2019-12-18
Supplement: bmjopen-2019-031947supp003.pdf [file bmjopen-2019-031947supp003.pdf]

| Supplemental Table 3           |            |                     |                    |         |                    |                    |         |                     |                     |                   |                    |                     |         |
|--------------------------------|------------|---------------------|--------------------|---------|--------------------|--------------------|---------|---------------------|---------------------|-------------------|--------------------|---------------------|---------|
| Variables                      |            | NC (N=275)          |                    |         | SMC (N=100)        |                    |         | MCI (N=559)         |                     |                   | DEMENTIA (N=143)   |                     |         |
|                                |            | Amyloid-<br>(N=202) | Amyloid+<br>(N=73) | q-value | Amyloid-<br>(N=72) | Amyloid+<br>(N=28) | q-value | Amyloid-<br>(N=269) | Amyloid+<br>(N=290) | q-value           | Amyloid-<br>(N=25) | Amyloid+<br>(N=118) | q-value |
| <b>Anxiety</b>                 | <b>Yes</b> | 3 (1.5)             | 2 (2.7)            | NS      | 0 (0)              | 0 (0)              | NS      | 6 (2.2)             | 38 (13.4)           | <b>&lt; 0.001</b> | 2 (8.3)            | 16 (14.7)           | NS      |
| <b>Elation</b>                 | <b>Yes</b> | 1 (0.5)             | 0 (0)              | NS      | 0 (0)              | 1 (3.6)            | NS      | 6 (2.2)             | 23 (8)              | <b>0.007</b>      | 2 (8)              | 6 (5.4)             | NS      |
| <b>Hallucinations</b>          | <b>Yes</b> | 14 (7.3)            | 10 (14.1)          | NS      | 4 (6.1)            | 2 (7.7)            | NS      | 59 (24.8)           | 84 (35.9)           | <b>0.014</b>      | 6 (27.3)           | 21 (24.7)           | NS      |
| <b>Delusions</b>               | <b>Yes</b> | 4 (2)               | 1 (1.4)            | NS      | 1 (1.4)            | 0 (0)              | NS      | 11 (4.2)            | 20 (7.1)            | NS                | 1 (4)              | 2 (1.7)             | NS      |
| <b>Apathy</b>                  | <b>Yes</b> | 18 (9.2)            | 12 (16.4)          | NS      | 1 (1.5)            | 0 (0)              | NS      | 50 (21.8)           | 94 (38.4)           | <b>&lt; 0.001</b> | 1 (11.1)           | 18 (24.3)           | NS      |
| <b>Agitation</b>               | <b>Yes</b> | 19 (9.8)            | 12 (16.7)          | NS      | 5 (7.2)            | 0 (0)              | NS      | 63 (27.3)           | 85 (36.2)           | 0.063             | 3 (18.8)           | 13 (15.5)           | NS      |
| <b>Depression</b>              | <b>Yes</b> | 31 (16.8)           | 20 (27.8)          | NS      | 11 (17.5)          | 2 (8)              | NS      | 74 (36.3)           | 95 (44.8)           | NS                | 3 (16.7)           | 15 (20.5)           | NS      |
| <b>Disinhibition</b>           | <b>Yes</b> | 12 (6.1)            | 9 (12.3)           | NS      | 5 (7)              | 1 (3.6)            | NS      | 36 (14.7)           | 63 (24.2)           | <b>0.014</b>      | 3 (15.8)           | 8 (8.2)             | NS      |
| <b>Irritability</b>            | <b>Yes</b> | 38 (20.9)           | 16 (23.2)          | NS      | 5 (7.9)            | 1 (4.2)            | NS      | 65 (32.7)           | 97 (45.5)           | <b>0.014</b>      | 8 (38.1)           | 16 (20.3)           | NS      |
| <b>Aberrant motor behavior</b> | <b>Yes</b> | 4 (2)               | 3 (4.1)            | NS      | 1 (1.4)            | 0 (0)              | NS      | 24 (9.2)            | 50 (18.1)           | <b>0.008</b>      | 3 (13)             | 16 (16.2)           | NS      |
| <b>Sleep disturbance</b>       | <b>Yes</b> | 37 (20.6)           | 20 (30.3)          | NS      | 6 (10.9)           | 2 (7.7)            | NS      | 80 (37.4)           | 81 (35.2)           | NS                | 2 (9.5)            | 12 (12.1)           | NS      |
| <b>Appetite changes</b>        | <b>Yes</b> | 28 (14.1)           | 18 (24.7)          | NS      | 3 (4.3)            | 0 (0)              | NS      | 51 (20.9)           | 90 (33.5)           | <b>0.007</b>      | 5 (31.2)           | 15 (16.1)           | NS      |
